# Supplementary material for: Genome-wide comparisons of variation in linkage disequilibrium
Source: HighWire-hosted journal article supplement (doi:10.1101/gr.092189.109), 2009-06-18
Supplement: varLD_SOM.pdf [file varLD_SOM.pdf]

## **Supplementary Material**

### **Genome-wide comparisons of variation in linkage disequilibrium**

Teo et al.

### **Population pairs compared**

We performed a total of 6 sets of comparisons, each between two datasets. The 6 sets of analyses compare:

1. 60 unrelated parents from HapMap CEU against 90 unrelated individuals from HapMap CHB+JPT, using unphased genotype data from the HapMap;
2. 60 unrelated parents from HapMap CEU against 60 unrelated parents from HapMap YRI, using unphased genotype data from the HapMap;
3. 60 unrelated parents from HapMap YRI against 90 unrelated individuals from HapMap CHB+JPT, using unphased genotype data from the HapMap;
4. 60 Jola samples from The Gambia against 60 unrelated parents from HapMap YRI, using unphased genotype data from MalariaGEN and the HapMap respectively;
5. 60 unrelated British samples from the 1958 Birth Cohort against 60 unrelated parents from HapMap CEU, using unphased genotype data from the WTCCC and the HapMap respectively;
6. two simulated datasets of 60 samples each resampled from the 60 unrelated parents in HapMap CEU, meant to investigate an empirical null distribution for varLD scores.

### **Comparison with imputation diagnostics**

Imputation of a target population from The Gambia was performed with the program IMPUTE, using the HapMap YRI panel as reference. The data used belong to the control dataset of a case-control genome-wide study in malaria, and imputation was performed on all 1,382 control individuals. To avoid SNPs with genotyping errors, only SNPs from the Gambian data with minor allele frequencies  $> 1\%$ ,  $< 5\%$  missingness and HWE  $P \geq 10^{-7}$  have been used for imputation. The default buffer region of 250kb on each end of the imputed region was used, and the effective population size  $N_e$  was set at 17,469 (a value recommended by the author of IMPUTE for HapMap YRI). All SNPs were mapped to the forward strand prior to imputation and we only considered autosomal chromosomes. We consider a composite metric of imputation diagnostic which is obtained as the product of the call rate and concordance of imputed genotypes. Each imputed call is assigned to the genotype with posterior probability  $> 0.9$ , or is otherwise classified as missing. Concordance at each imputed SNP is calculated as the proportion of imputed genotypes that agree with the observed genotypes. As such, this metric is only calculated for SNPs that exist on the Affymetrix platform and have passed our criteria on missingness and minor allele frequencies.

## Simulations for sensitivity analysis

We perform a series of simulations in order to assess the sensitivity of varLD at identifying differences in LD. We also investigate the effect of genotyping errors on the varLD signals. Artificial data with differences in patterns of LD is simulated using the program HAPGEN, available online with documentation at:

<http://www.stats.ox.ac.uk/~marchini/software/gwas/hapgen.html>.

Genotype data spanning a 1Mb region on chromosome 19 was simulated by conditioning on the 120 chromosomes belonging to the 60 unrelated parents from the HapMap CEU panel, and the estimate of the fine-scale recombination rate across this region. Although HAPGEN simulates case-control datasets, we only simulated control data under the setting that parameters for relative risks were all set to 1. While the 1Mb region spans 329 SNPs, our sensitivity analyses only consider a window of 50 SNPs in the center of the region. LD differences across two populations were simulated through the use of different recombination rates in the two populations, while genotyping error is introduced by replacing the simulated genotypes by random assignment conditioned on the allele frequency under the assumption of Hardy-Weinberg equilibrium. We consider a total of 7 scenarios in our sensitivity analysis, each performed over 1000 independent iterations:

- (i) 2 populations of 60 individuals each, with identical fine-scale recombination rates corresponding to that reported by the HapMap (see **Supplementary Fig. 6**);
- (ii) 2 populations of 60 individuals each, with identical fine-scale recombination rates corresponding to that reported by the HapMap and incorporated genotyping error in the second population at the 1<sup>st</sup> SNP in the window of 50 SNPs;
- (iii) 2 populations of 60 individuals each, with identical fine-scale recombination rates corresponding to that reported by the HapMap and incorporated genotyping error in the second population at the 20<sup>th</sup> SNP in the window of 50 SNPs;
- (iv) 2 populations of 60 individuals each, with identical fine-scale recombination rates corresponding to that reported by the HapMap and incorporated genotyping error in the second population at five chosen SNPs in the window of 50 SNPs. The positions of these five SNPs were arbitrarily determined in the first iteration, but kept fixed subsequently throughout the rest of the iterations (corresponding to the 3<sup>rd</sup>, 17<sup>th</sup>, 23<sup>rd</sup>, 38<sup>th</sup>, 40<sup>th</sup> SNP);
- (v) 2 populations of 60 individuals each, with identical fine-scale recombination rates corresponding to that reported by the HapMap and incorporated genotyping error in the second population at five consecutive SNPs in the beginning of the window of 50 SNPs;
- (vi) 2 populations of 60 individuals each. Fine-scale recombination rates corresponding to that reported by the HapMap were used for both populations except that the recombination rates for SNPs 196 to 200 in population 2 were replaced by random draws from the possible blocks of 5 recombination rates across the entire region. Thus the recombination rates between the two populations are exactly identical except between the 196<sup>th</sup> SNP and 200<sup>th</sup> SNP inclusive (see **Supplementary Fig. 6**);
- (vii) 2 populations of 60 individuals each. Fine-scale recombination rates corresponding to that reported by the HapMap were used for both populations except that the recombination rates for SNPs 181 to 200 in population 2 were replaced by random draws from possible blocks of 30 recombination rates across the entire region. Thus the recombination rates between the two populations are exactly identical except between the 181<sup>th</sup> SNP and 200<sup>th</sup> SNP inclusive (see **Supplementary Fig. 6**).

As the simulations effectively compare the CEU population against itself, we standardize the varLD signals using the mean and standard deviation obtained in our genome-wide comparison of the two

simulated CEU datasets. We calculated the proportion of simulations out of 1000 iterations where the standardized varLD score is greater than the 90<sup>th</sup>, 95<sup>th</sup> and 99<sup>th</sup> quantiles of the genome-wide distribution of standardized varLD scores obtained in the comparisons of the two simulated CEU datasets. This is defined as the positive rate, and the false positive rate can be obtained under scenario (i) with two populations of 60 individuals simulated while conditioning on identical fine-scale recombination rates. The positive rates obtained for scenarios (ii) – (v) represent the sensitivity of varLD to different extent of genotyping errors. Scenarios (vi) and (vii) are meant to represent varying extent of LD differences between two populations.

**Supplementary Figure 1.** Density plot of the distribution of standardized varLD scores in each of the six population-pair comparisons.

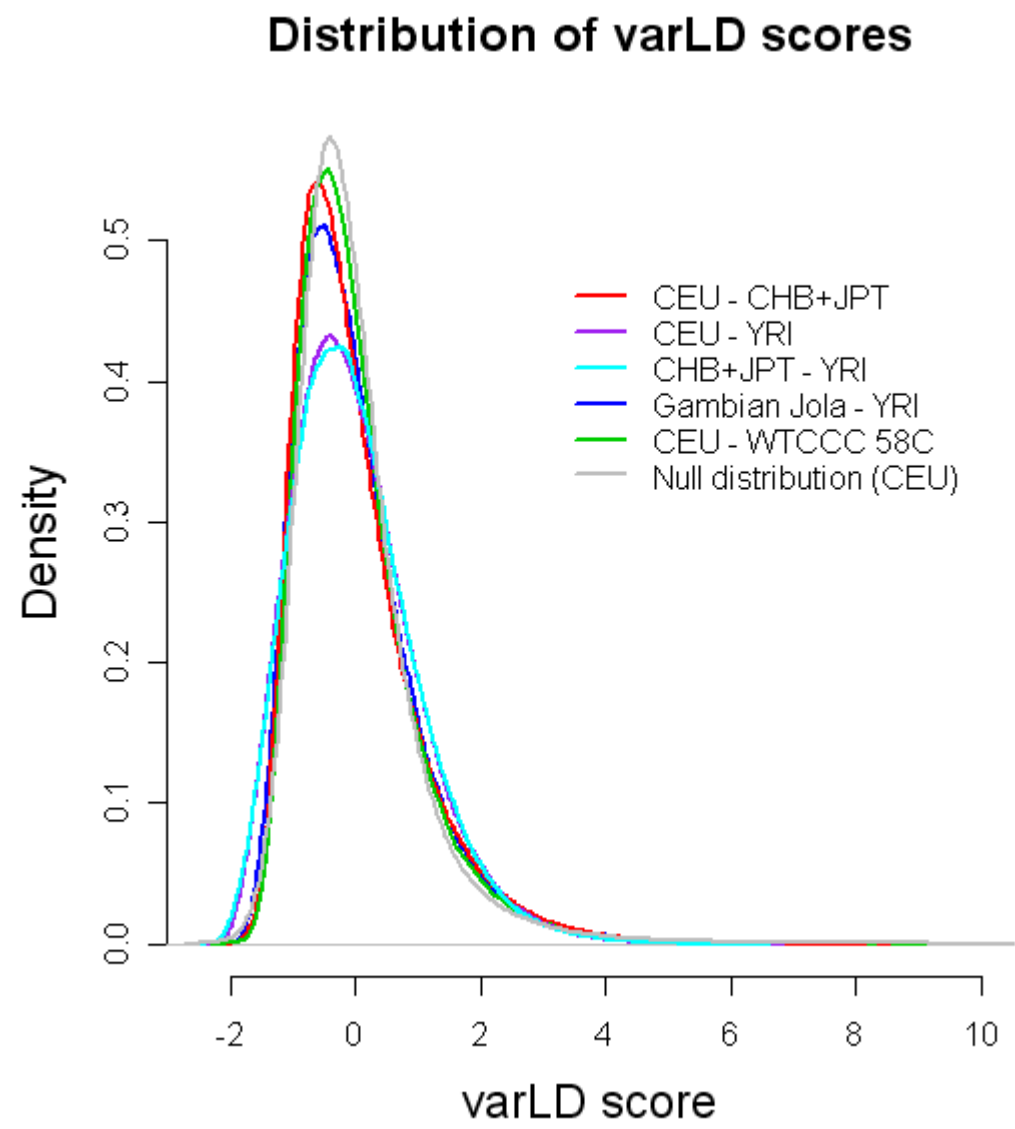

**Supplementary Figure 2.** Heatmap representations of LD at the *NRG1* gene on chromosome 8 between pairs of populations in HapMap. The upper left and lower right triangles of each plot correspond to the LD in a region for each of two populations respectively as measured by the pairwise  $r^2$  metric, with the left panel comparing HapMap Europeans with HapMap Asians, the middle panel comparing HapMap Europeans with HapMap Africans, and the right panel comparing HapMap Africans with HapMap Asians.

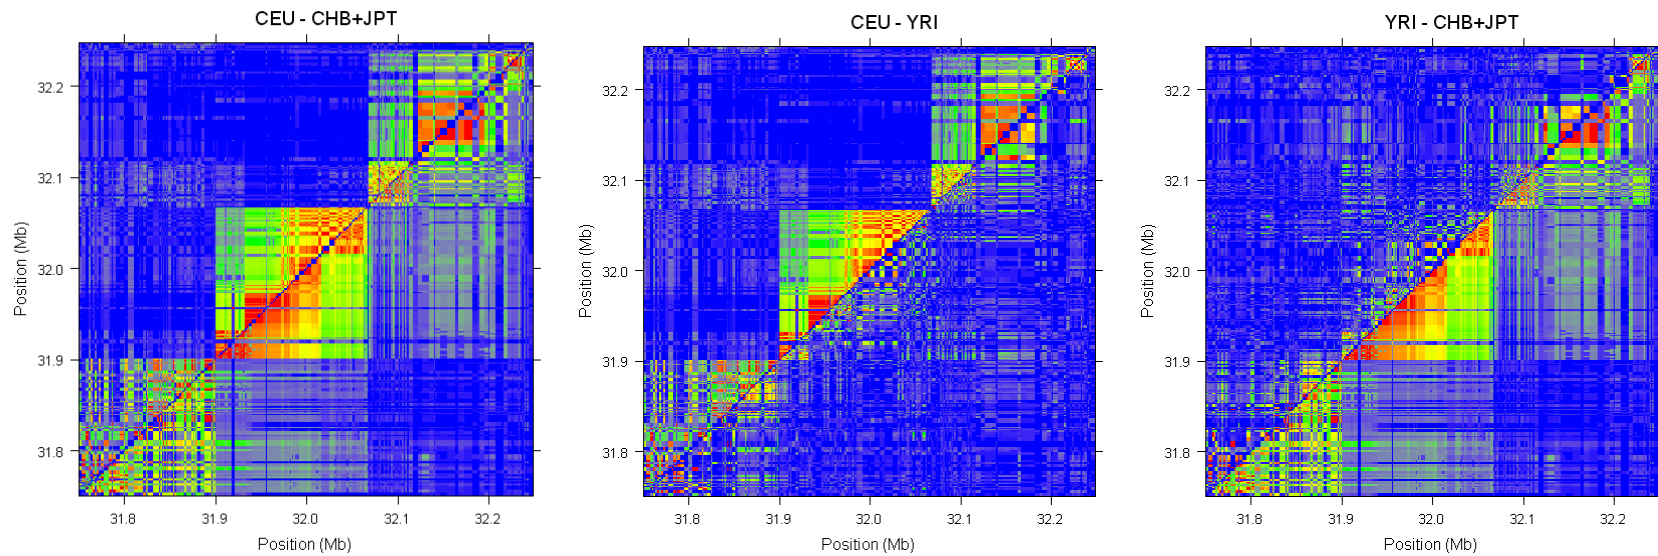

**Supplementary Figure 3.** An illustration of the haplotype diversity at the *NRG1* gene across the samples in the Human Genome Diversity Project (HGDP), categorized according to continents. Each colour refers to a template haplotype that is most common in a specific continent, and each chromosome in the HGDP is mapped as a mosaic of the seven template haplotypes. The figure is generated using the online genome browser by the Pritchard Lab, available at <http://hgdh.uchicago.edu/cgi-bin/gbrowse/HGDP>.

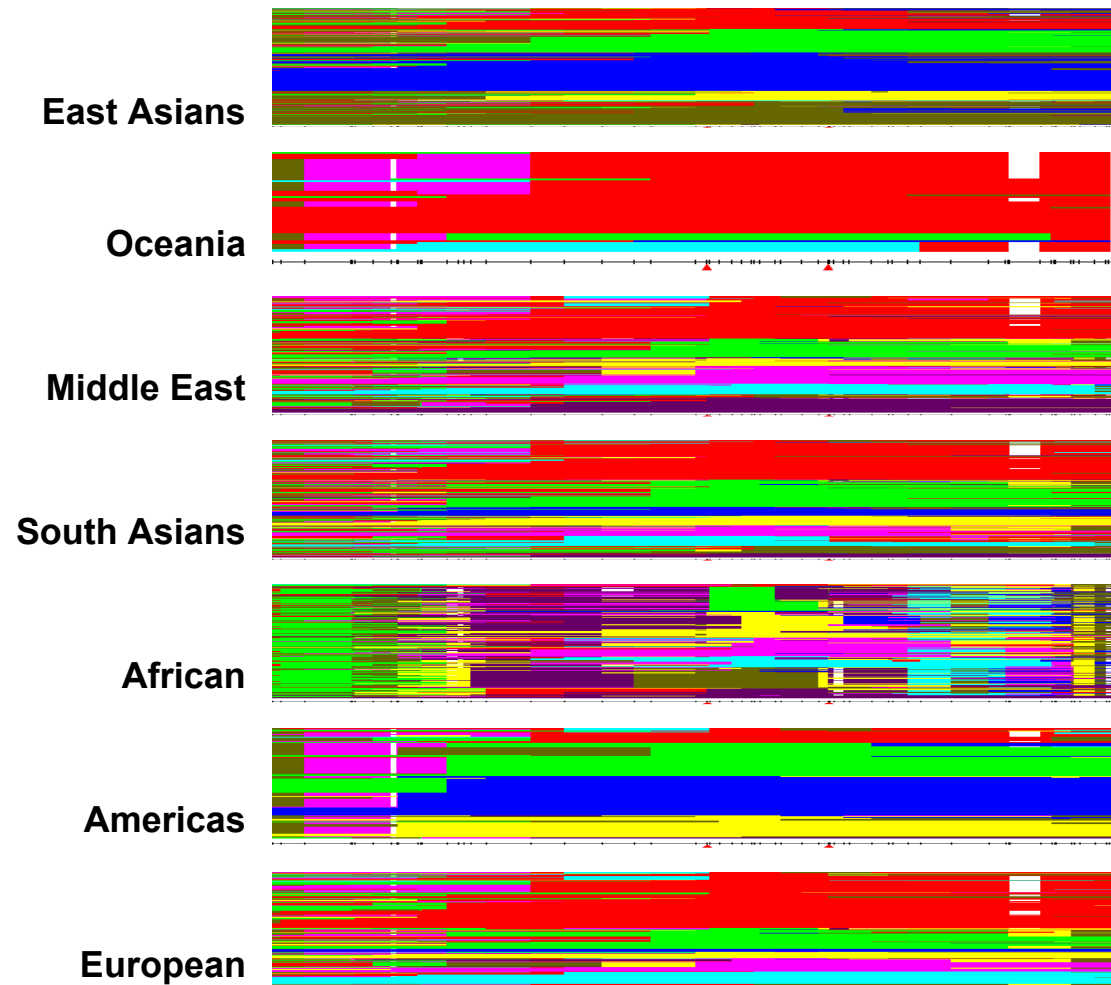

**Supplementary Figure 4.** Standardized varLD scores in the top 20 candidate regions identified with significant LD differences between all five sets of population comparisons as reported in Table 1 in the main text. Only scores above their respective 95<sup>th</sup> quantiles are shown, and points in red correspond to LD comparisons between HapMap Europeans (CEU) and HapMap East Asians (CHB+ JPT); points in purple between CEU and HapMap Africans (YRI); points in cyan between CHB+JPT and YRI; points in green between two European populations (HapMap CEU and WTCCC 58C); points in blue between two African populations (HapMap YRI and Gambian Jola). Dotted lines in each panel designate the start and end positions of each identified region.



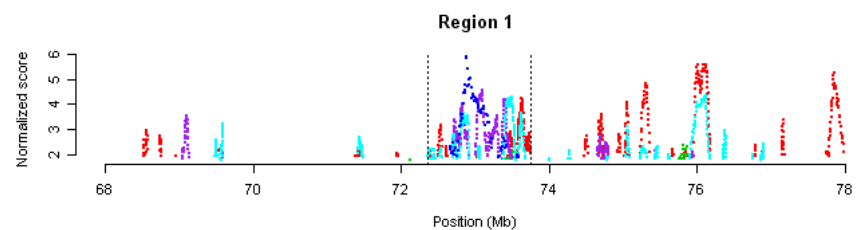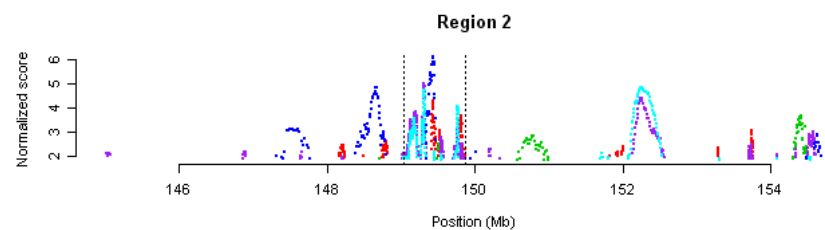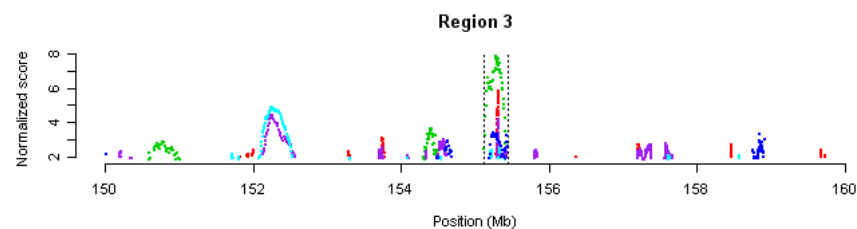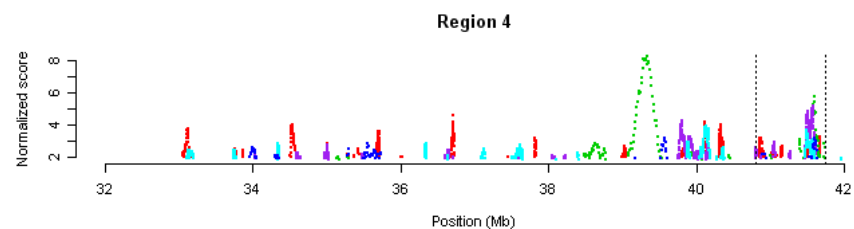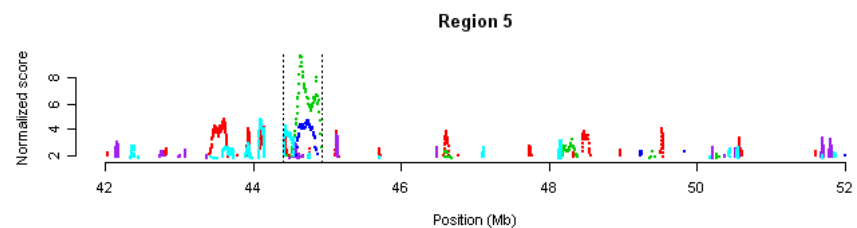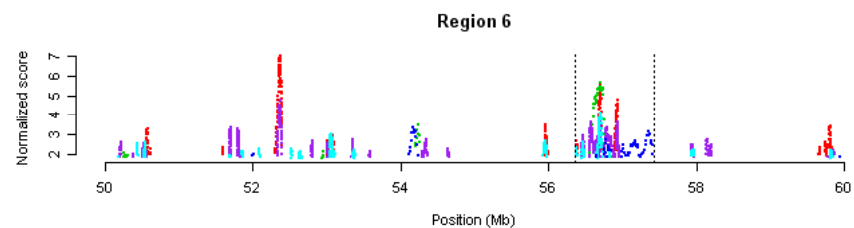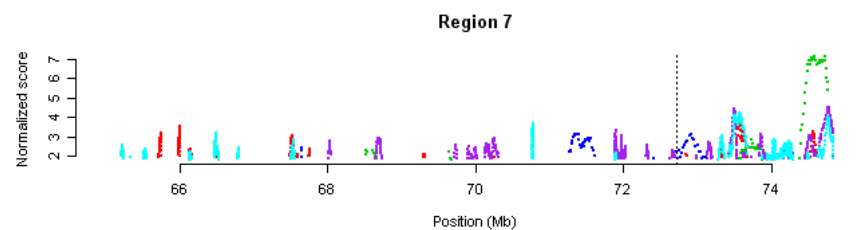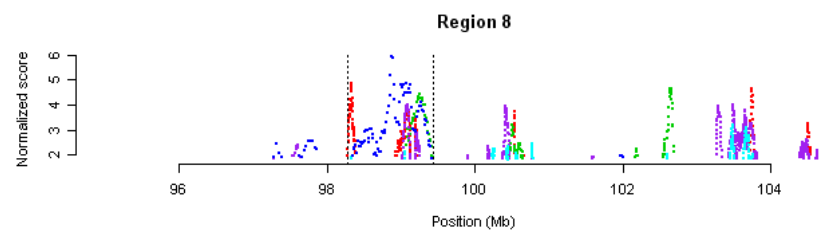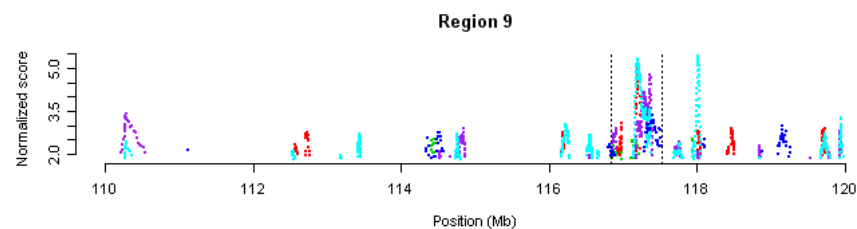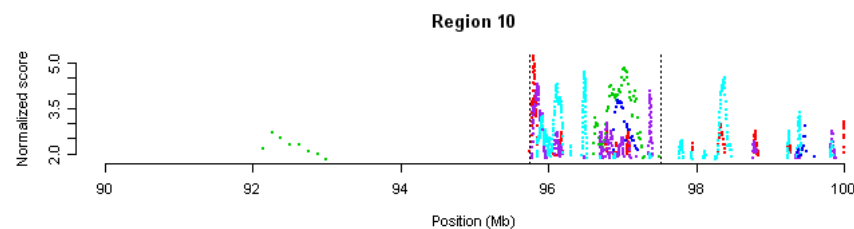

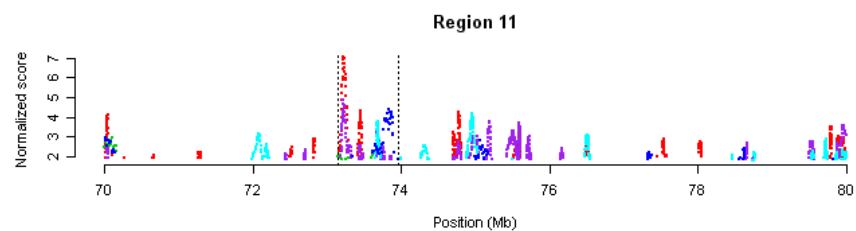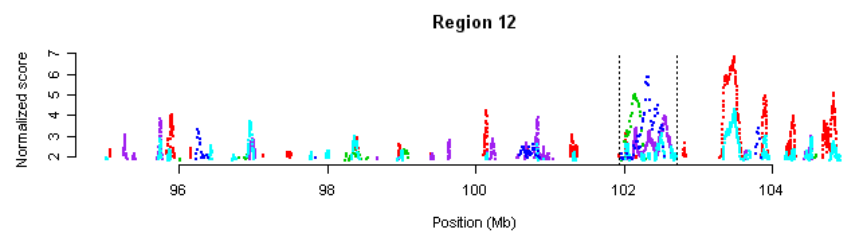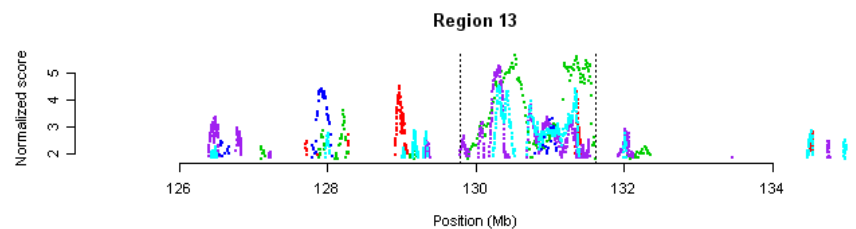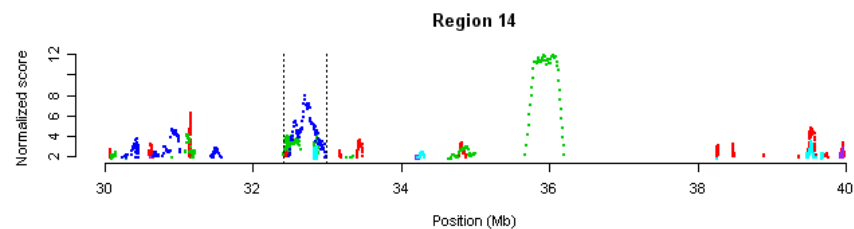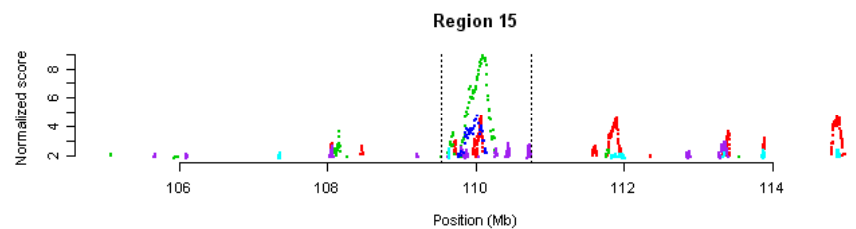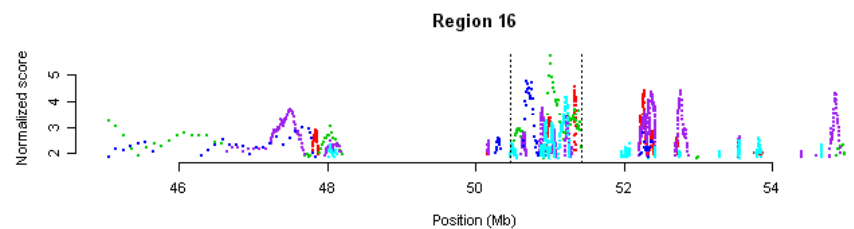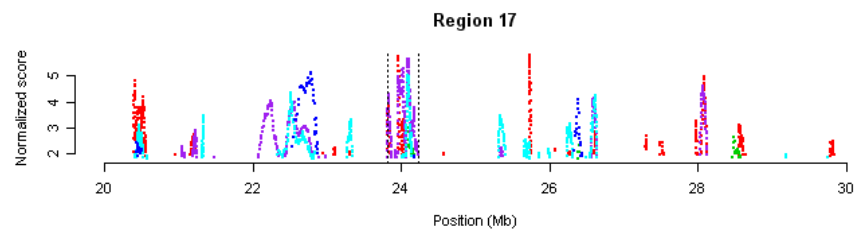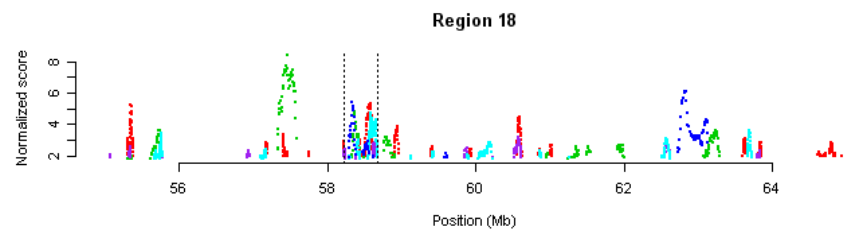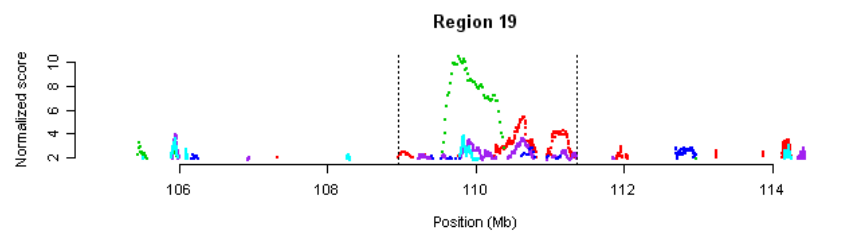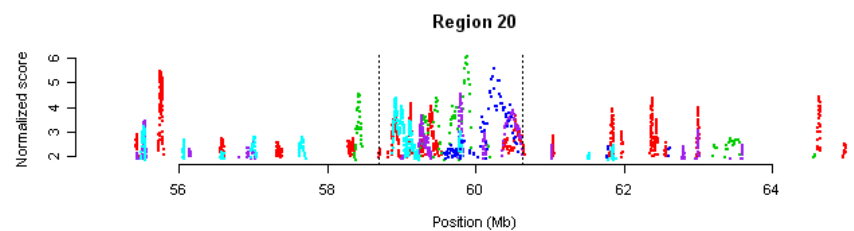

**Supplementary Figure 5.** Standardized varLD scores across different population pairs in the top 20 candidate regions undergoing positive selection from Sabeti et al. as reported in Table 2 in the main text. Only scores above their respective 95<sup>th</sup> quantiles are shown in a non-gray colour, and points in red correspond to LD comparisons between HapMap Europeans (CEU) and HapMap Asians (CHB+JPT); points in purple between CEU and HapMap Africans (YRI); points in cyan between CHB+JPT and YRI. Dotted lines in each panel designate the approximate start and end positions each region.

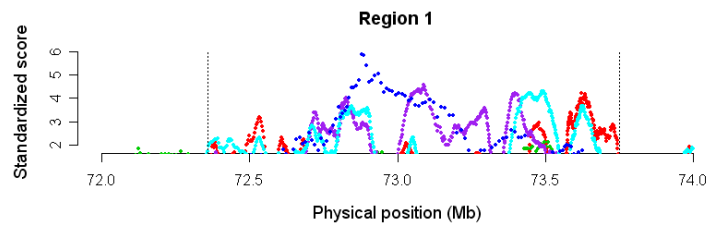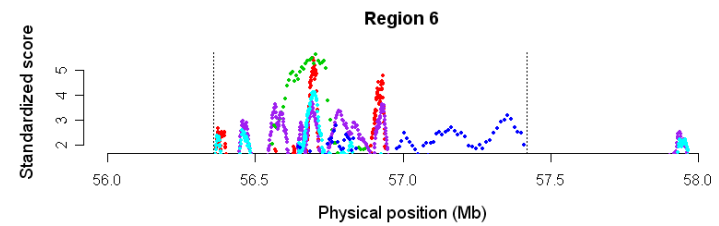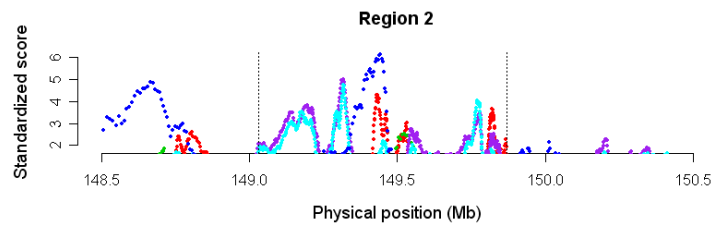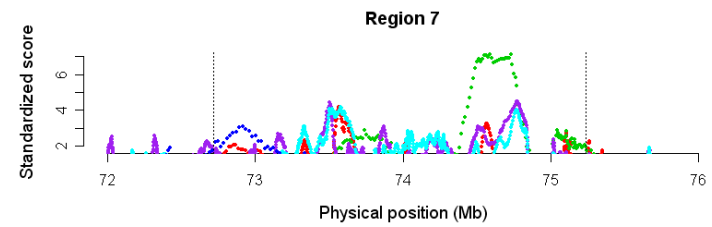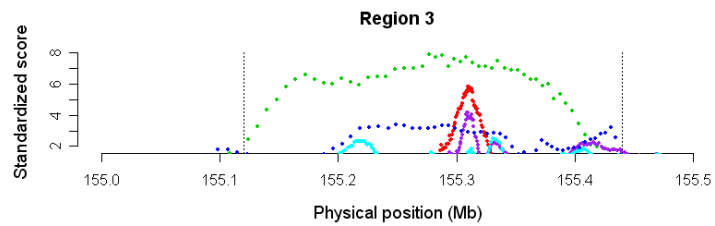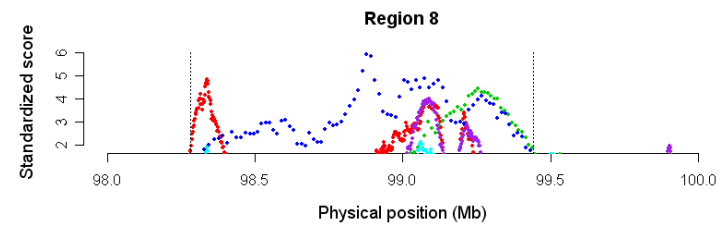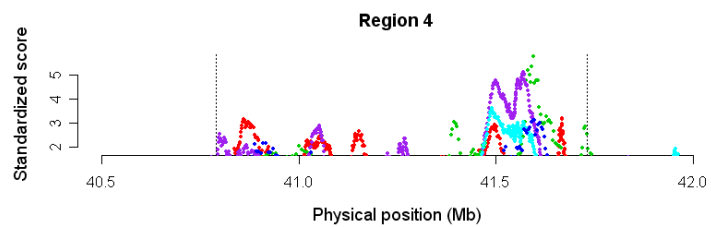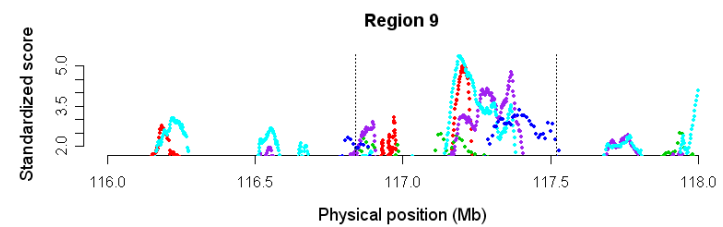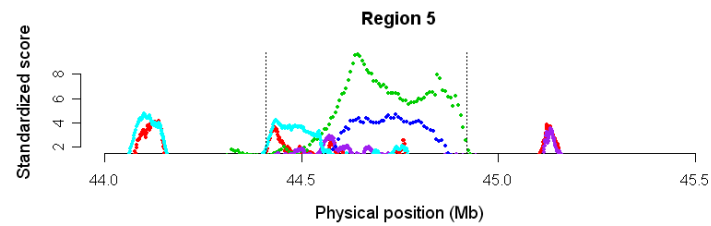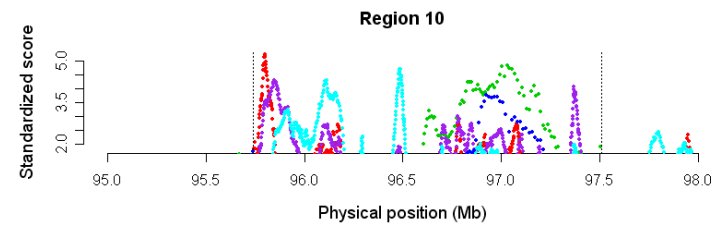

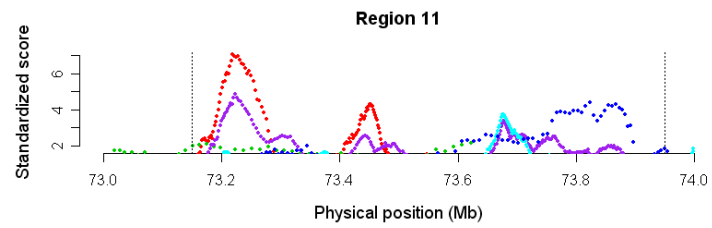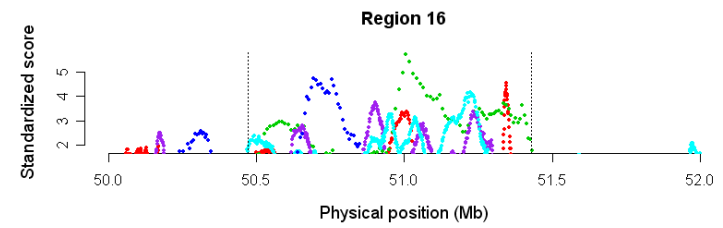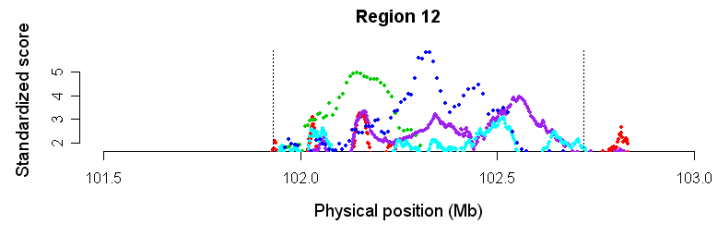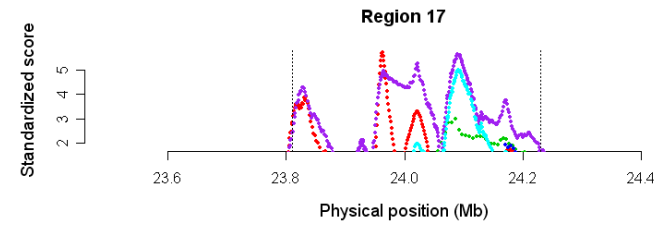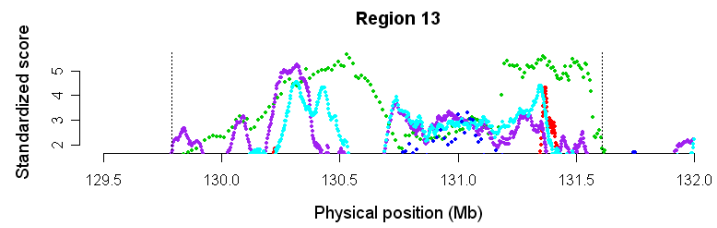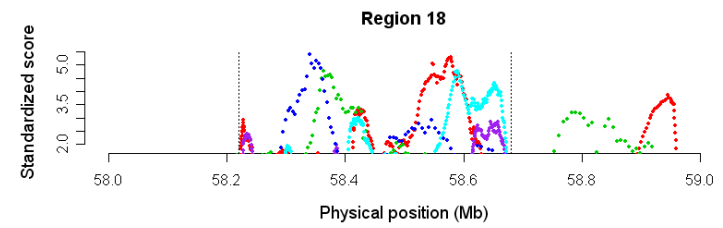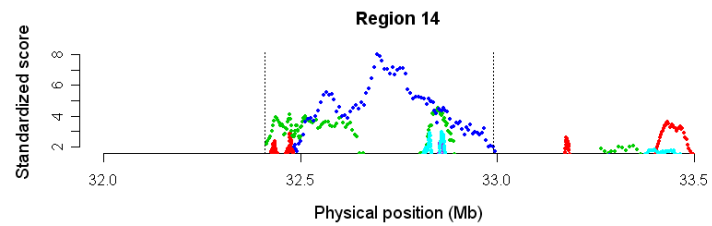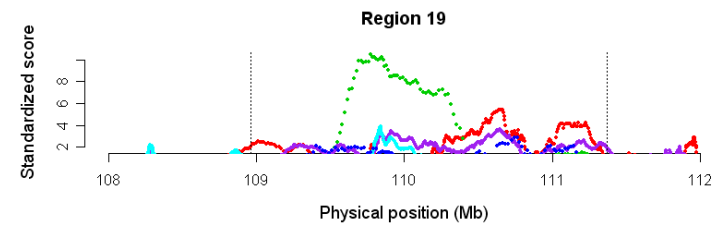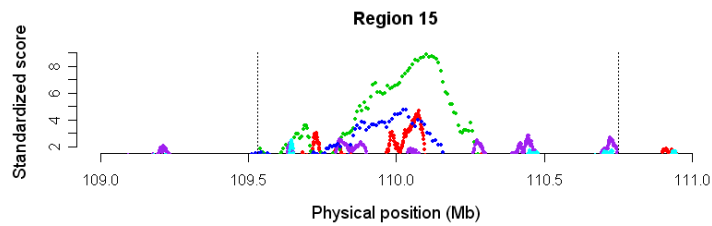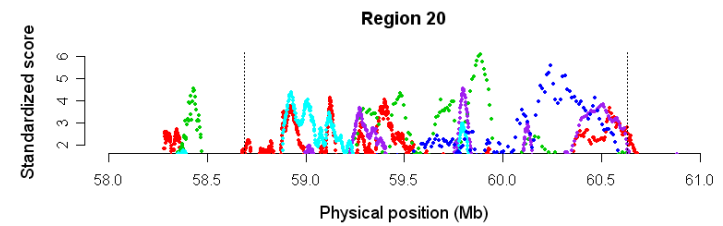

**Supplementary Figure 6.** Fine-scale recombination rates in the window of 50 SNPs used in a simulation exercise to investigate the sensitivity of varLD. The top panel shows the original fine-scale recombination rates for 50 SNPs; the middle panel shows the fine-scale recombination rates for the same 50 SNPs, except that the rates for the last 5 SNPs are different; the bottom panel shows the fine-scale recombination rates for the same 50 SNPs, except that the rates for the last 20 SNPs are different.

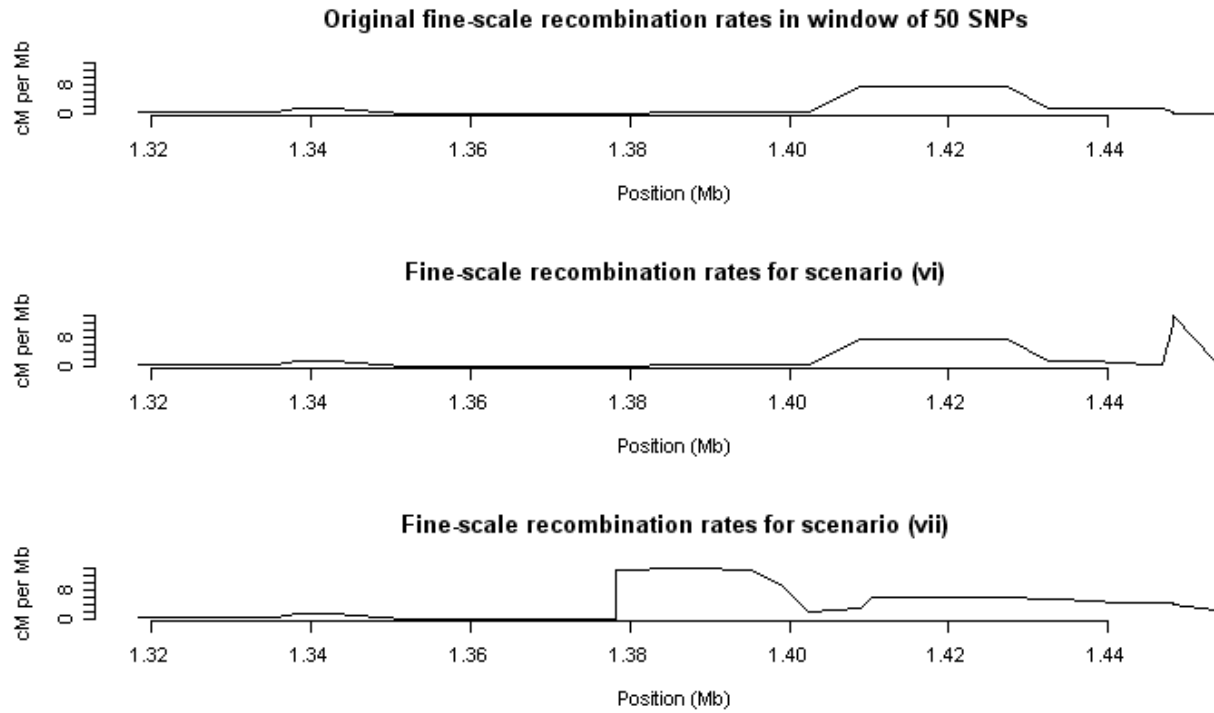

**Supplementary Table 1.** Top 20 candidate regions with overlapping signals of LD differences between CEU and CHB+JPT.

| Region | Chr: start – end<br>(Mb, HG17) | Genes in region                           | CNV<br>region | Details<br>(type <sup>1</sup> , population <sup>2</sup> )          |
|--------|--------------------------------|-------------------------------------------|---------------|--------------------------------------------------------------------|
| 1      | chr1: 102.80 – 103.30          | <i>COL11A1</i>                            | No            | -                                                                  |
| 2      | chr1: 106.53 – 106.99          | -                                         | Yes           | Deletions, HapMap samples                                          |
| 3      | chr1: 201.44 – 201.56          | <i>NFASC</i>                              | No            | -                                                                  |
| 4      | chr2: 52.30 – 52.62            | -                                         | No            | -                                                                  |
| 5      | chr2: 149.82 – 150.50          | <i>C2orf25</i>                            | No            | -                                                                  |
| 6      | chr3: 99.99 – 100.23           | <i>ST3GAL6, DCBLD2</i>                    | No            | -                                                                  |
| 7      | chr3: 109.63 – 109.98          | <i>KIAA1524, DZIP3, RETNLB</i>            | No            | -                                                                  |
| 8      | chr4: 26.99 – 27.42            | -                                         | No            | -                                                                  |
| 9      | chr4: 73.17 – 73.47            | <i>GPR74</i>                              | No            | -                                                                  |
| 10     | chr5: 103.29 – 103.60          | -                                         | Yes           | Deletions, HapMap samples and HapMap-CEU                           |
| 11     | chr7: 86.23 – 86.39            | <i>KIAA1324L</i>                          | No            | -                                                                  |
| 12     | chr9: 10.83 – 11.42            | -                                         | Yes           | Deletions, German and HapMap samples                               |
| 13     | chr10: 111.42 – 111.48         | -                                         | No            | -                                                                  |
| 14     | chr11: 82.93 – 83.66           | <i>DLG2</i>                               | Yes           | Copy number differences, French and HapMap samples                 |
| 15     | chr11: 100.11 – 100.60         | <i>PGR</i>                                | No            | -                                                                  |
| 16     | chr11: 131.36 – 131.44         | <i>HNT</i>                                | Yes           | Insertions, Chinese samples                                        |
| 17     | chr13: 87.91 – 88.36           | -                                         | Yes           | Copy number differences, HapMap and 36 diverse human samples       |
| 18     | chr13: 106.22 – 106.56         | -                                         | Yes           | Insertions, CEPH and Japanese samples                              |
| 19     | chr15: 46.04 – 46.67           | <i>SLC24A5, DUT, MYEF2, SLC12A1, FBN1</i> | Yes           | Deletions, HapMap samples, HapMap-CEU and 36 diverse human samples |
| 20     | chr21: 24.31 – 24.34           | -                                         | No            | -                                                                  |

<sup>1</sup> Copy number differences refer to the occurrence of both insertions and deletions.

<sup>2</sup> CEPH/Chinese/Japanese/Yoruba samples: Kidd et al. (2008); German: Pinto et al. (2007); HapMap samples: Conrad et al. (2006), McCarroll et al. (2006), Redon et al. (2006), Pinto et al. (2007); French: de Smith et al. (2007); Canadian Ontario controls: Zogopoulos et al. (2007); HapMap-CEU: Wang et al. (2008); 36 diverse human samples: Mills et al. (2006).

**Supplementary Table 2.** Top 20 candidate regions with overlapping signals of LD differences between CEU and YRI.

| Region | Chr: start – end<br>(Mb, HG17) | Genes in region                                           | CNV<br>region | Details<br>(type <sup>1</sup> , population <sup>2</sup> )                 |
|--------|--------------------------------|-----------------------------------------------------------|---------------|---------------------------------------------------------------------------|
| 1      | chr1: 105.57 – 105.69          | -                                                         | Yes           | Copy number differences, HapMap-CEU                                       |
| 2      | chr3: 40.34 – 40.70            | <i>ENTPD3, RPL14, ZNF619, ZNF620, ZNF621</i>              | Yes           | Deletions, HapMap-CEU                                                     |
| 3      | chr4: 17.02 – 17.37            | <i>QDPR, LAP3, MED28</i>                                  | Yes           | Deletions, HapMap samples and 36 diverse human samples                    |
| 4      | chr5: 88.33 – 88.47            | -                                                         | No            | -                                                                         |
| 5      | chr5: 129.79 – 131.54          | <i>HINT1, ACSL6, CDC42SE2, IL3, RAPGEF6, KIAA1961</i>     | Yes           | Deletions, HapMap samples                                                 |
| 6      | chr8: 64.59 – 64.84            | -                                                         | No            | -                                                                         |
| 7      | chr8: 91.02 – 92.21            | <i>NBN, DECR1, CALB1, TMEM64, TMEM55A, EFCBP1, OTUD6B</i> | Yes           | Copy number differences, German, HapMap samples, 36 diverse human samples |
| 8      | chr8: 92.55 – 93.24            | <i>RUNX1T1</i>                                            | No            | -                                                                         |
| 9      | chr8: 102.75 – 102.95          | <i>GRHL2, NCALD</i>                                       | No            | -                                                                         |
| 10     | chr9: 34.77 – 34.92            | -                                                         | No            | -                                                                         |
| 11     | chr10: 23.81 – 24.23           | -                                                         | No            | -                                                                         |
| 12     | chr10: 111.03 – 111.80         | <i>XPNPEP1, ADD3</i>                                      | No            | -                                                                         |
| 13     | chr10: 121.95 – 122.18         | -                                                         | Yes           | Deletions, 36 diverse human samples                                       |
| 14     | chr11: 77.59 – 78.34           | <i>GAB2</i>                                               | Yes           | Copy number differences, French and HapMap samples                        |
| 15     | chr12: 23.31 – 23.52           | -                                                         | No            | -                                                                         |
| 16     | chr13: 44.57 – 44.75           | <i>GTF2F2, KCTD4</i>                                      | No            | -                                                                         |
| 17     | chr14: 78.51 – 78.66           | <i>NRXN3</i>                                              | No            | -                                                                         |
| 18     | chr15: 55.90 – 56.00           | -                                                         | No            | -                                                                         |
| 19     | chr17: 56.22 – 56.63           | <i>BCAS3</i>                                              | No            | -                                                                         |
| 20     | chr19: 34.49 – 34.56           | -                                                         | No            | -                                                                         |

<sup>1</sup> Copy number differences refer to the occurrence of both insertions and deletions.

<sup>2</sup> CEPH/Chinese/Japanese/Yoruba samples: Kidd et al. (2008); German: Pinto et al. (2007); HapMap samples: Conrad et al. (2006), McCarroll et al. (2006), Redon et al. (2006), Pinto et al. (2007); French: de Smith et al. (2007); Canadian Ontario controls: Zogopoulos et al. (2007); HapMap-CEU: Wang et al. (2008); 36 diverse human samples: Mills et al. (2006).



**Supplementary Table 3.** Top 20 candidate regions with overlapping signals of LD differences between CHB+JPT and YRI.

| Region | Chr: start – end<br>(Mb, HG17) | Genes in region                          | CNV<br>region | Details<br>(type <sup>1</sup> , population <sup>2</sup> )                    |
|--------|--------------------------------|------------------------------------------|---------------|------------------------------------------------------------------------------|
| 1      | chr1: 106.35 – 107.29          | -                                        | Yes           | Copy number differences, HapMap samples                                      |
| 2      | chr2: 117.14 – 117.38          | -                                        | Yes           | Deletions, HapMap samples                                                    |
| 3      | chr2: 117.69 – 118.05          | -                                        | Yes           | Deletions, HapMap samples                                                    |
| 4      | chr2: 215.20 – 215.64          | <i>BARD1, ABCA12</i>                     | No            | -                                                                            |
| 5      | chr4: 84.71 – 84.91            | <i>HEL308, MRPS18C</i>                   | No            | -                                                                            |
| 6      | chr5: 19.04 – 19.25            | -                                        | Yes           | Deletions, Yoruba and HapMap samples                                         |
| 7      | chr5: 26.54 – 27.77            | <i>CDH9</i>                              | Yes           | Copy number differences, CEPH and Yoruba samples, HapMap-CEU                 |
| 8      | chr5: 145.36 – 145.55          | <i>SH3RF2, PLAC8L1, LARS</i>             | No            | -                                                                            |
| 9      | chr5: 159.93 – 160.00          | -                                        | No            | -                                                                            |
| 10     | chr7: 3.61 – 4.19              | <i>SDK1</i>                              | Yes           | Copy number differences, CEPH, Yoruba and HapMap samples                     |
| 11     | chr7: 107.99 – 108.80          | -                                        | Yes           | Insertions, HapMap samples                                                   |
| 12     | chr7: 154.91 – 155.23          | <i>RMB33, SHH</i>                        | Yes           | Deletions, Yoruba-Trios and 36 diverse human samples                         |
| 13     | chr8: 85.34 – 86.62            | <i>LRRCC1, E2F5, CA13, CA1, CA2, CA3</i> | Yes           | Copy number differences, Yoruba and HapMap samples, 36 diverse human samples |
| 14     | chr8: 111.57 – 112.30          | -                                        | No            | -                                                                            |
| 15     | chr9: 10.81 – 11.64            | -                                        | No            | -                                                                            |
| 16     | chr10: 10.02 – 10.34           | -                                        | Yes           | Deletions, HapMap samples                                                    |
| 17     | chr10: 24.02 – 24.14           | -                                        | No            | -                                                                            |
| 18     | chr11: 77.58 – 78.36           | <i>GAB2</i>                              | Yes           | Copy number differences, French and HapMap samples                           |
| 19     | chr14: 31.10 – 31.45           | <i>NUBPL</i>                             | No            | -                                                                            |
| 20     | chr19: 34.50 – 34.55           | -                                        | No            | -                                                                            |

<sup>1</sup> Copy number differences refer to the occurrence of both insertions and deletions.

<sup>2</sup> CEPH/Chinese/Japanese/Yoruba samples: Kidd et al. (2008); German: Pinto et al. (2007); HapMap samples: Conrad et al. (2006), McCarroll et al. (2006), Redon et al. (2006), Pinto et al. (2007); French: de Smith et al. (2007); Canadian Ontario controls: Zogopoulos et al. (2007); HapMap-CEU: Wang et al. (2008); 36 diverse human samples: Mills et al. (2006); CEU-Trios/Yoruba-Trios: Conrad et al. (2006).

**Supplementary Table 4.** Top 20 candidate regions with overlapping signals of LD differences between Gambian Jola and YRI.

| Region | Chr: start – end<br>(Mb, HG17) | Genes in region                                                                                                                                                                 | CNV<br>region | Details<br>(type <sup>1</sup> , population <sup>2</sup> )                                                      |
|--------|--------------------------------|---------------------------------------------------------------------------------------------------------------------------------------------------------------------------------|---------------|----------------------------------------------------------------------------------------------------------------|
| 1      | chr1: 93.45 – 94.72            | <i>CCDC18, DRI, FNBP1L, BCAR3, DNTTIP2, GCLM, ABCA4, ARHGAP29, ABCD3, F3</i>                                                                                                    | No            | -                                                                                                              |
| 2      | chr1: 149.34 – 149.47          | <i>LCE2C, LCE2D, LCE3A, LCE3B, LCE3C, LCE3D, LCE3E</i>                                                                                                                          | Yes           | Copy number differences, multiple global populations (CEPH, German, Japanese, Yoruba and HapMap samples)       |
| 3      | chr1: 194.83 – 195.18          | <i>NEK7</i>                                                                                                                                                                     | No            | -                                                                                                              |
| 4      | chr2: 161.10 – 162.57          | <i>PBX1, LMX1A, RXRG, LRRC52, MGST3, ALDH9A1, TMC01, UCK2</i>                                                                                                                   | Yes           | Deletions, HapMap-CEU and CEU-Trios                                                                            |
| 5      | chr2: 194.35 – 195.07          | -                                                                                                                                                                               | Yes           | Deletions, Yoruba and HapMap samples, 36 diverse human samples                                                 |
| 6      | chr4: 139.06 – 139.88          | <i>SLC7A11</i>                                                                                                                                                                  | Yes           | Copy number differences, Yoruba samples                                                                        |
| 7      | chr6: 25.93 – 26.43            | <i>SLC17A2, TRIM38, HFE, RPS10P1, H3F3AP1, HIST1H cluster (~1A, 3A, 4A, 4B, 3B, 2AB, 2BB, 3C, 1C, 4C, 1T, 2BC, 2AC, 1E, 2BD, 2BF, 1D, 4F, 4G, 3F, 2BH, 4H, PS2, PS1, 2APS4)</i> | Yes           | Deletions, Yoruba samples                                                                                      |
| 8      | chr6: 32.48 – 32.99            | <i>HLA-DRA, HLA-DRB5, HLA-DRB1, HLA-DQA1, HLA-DOB, HLA-DQA2, HLA-DQB2, TAP2, PSMB8, TAP1, PSMB9</i>                                                                             | Yes           | Copy number differences, French and HapMap samples, YRI-Trios                                                  |
| 9      | chr6: 48.87 – 49.46            | -                                                                                                                                                                               | No            | -                                                                                                              |
| 10     | chr7: 124.00 – 124.47          | <i>POT1</i>                                                                                                                                                                     | No            | -                                                                                                              |
| 11     | chr8: 136.97 – 137.26          | -                                                                                                                                                                               | Yes           | Deletions, Yoruba samples                                                                                      |
| 12     | chr9: 15.43 – 16.01            | <i>SNAPC3, PSIP1, C9orf93</i>                                                                                                                                                   | Yes           | Deletions, multiple global populations (CEPH, French, German, Yoruba, HapMap samples)                          |
| 13     | chr9: 21.65 – 21.96            | <i>MTAP</i>                                                                                                                                                                     | No            | -                                                                                                              |
| 14     | chr10: 31.13 – 31.45           | -                                                                                                                                                                               | No            | -                                                                                                              |
| 15     | chr10: 62.73 – 63.14           | <i>TMEM26</i>                                                                                                                                                                   | No            | -                                                                                                              |
| 16     | chr11: 47.99 – 52.56           | <i>PTPRJ, FOLH1, OR4 cluster (~B1, X2, X1, S1, C3, A47, C13, C12, A5, C46)</i>                                                                                                  | Yes           | Copy number differences, multiple global populations (CEPH, Canadian, French, German, Chinese, HapMap samples) |
| 17     | chr11: 84.30 – 84.92           | <i>DLG2</i>                                                                                                                                                                     | Yes           | Deletions, HapMap samples                                                                                      |
| 18     | chr12: 30.23 – 30.44           | -                                                                                                                                                                               | No            | -                                                                                                              |
| 19     | chr18: 63.67 – 63.87           | -                                                                                                                                                                               | No            | -                                                                                                              |
| 20     | chr19: 34.39 – 34.81           | <i>UQCRRFSI</i>                                                                                                                                                                 | Yes           | Deletions, Chinese and HapMap samples                                                                          |

<sup>1</sup> Copy number differences refer to the occurrence of both insertions and deletions.

<sup>2</sup> CEPH/Chinese/Japanese/Yoruba samples: Kidd et al. (2008); German: Pinto et al. (2007); HapMap samples: Conrad et al. (2006), McCarroll et al. (2006), Redon et al. (2006), Pinto et al. (2007); French: de Smith et al. (2007); Canadian Ontario controls: Zogopoulos et al. (2007); HapMap-CEU: Wang et al. (2008); 36 diverse human samples: Mills et al. (2006); CEU-Trios/Yoruba-Trios: Conrad et al. (2006).

**Supplementary Table 5.** Top 20 candidate regions with overlapping signals of LD differences between CEU and WTCCC-58C.

| Region | Chr: start – end<br>(Mb, HG17) | Genes in region                                                           | CNV<br>region | Details<br>(type <sup>1</sup> , population <sup>2</sup> )                                                                                |
|--------|--------------------------------|---------------------------------------------------------------------------|---------------|------------------------------------------------------------------------------------------------------------------------------------------|
| 1      | chr1: 155.12 – 155.42          | <i>CD1E, OR10T2, OR10K2, OR10K1, OR10R2, OR6Y1, OR10Z1, OR10X1, SPTA1</i> | No            | -                                                                                                                                        |
| 2      | chr1: 165.79 – 166.06          | <i>ATP1B1, NME7</i>                                                       | Yes           | Copy number differences, French and HapMap-CEU                                                                                           |
| 3      | chr1: 185.99 – 186.40          | -                                                                         | Yes           | Deletions, Canadian, German, HapMap samples and HapMap-CEU                                                                               |
| 4      | chr2: 39.08 – 39.53            | <i>RHBDL2, C1orf108, NDUFS5, MACF1</i>                                    | No            | -                                                                                                                                        |
| 5      | chr2: 44.46 – 44.92            | <i>SLC3A1, PREPL, C2orf34</i>                                             | No            | -                                                                                                                                        |
| 6      | chr2: 74.38 – 75.24            | -                                                                         | Yes           | Copy number differences, German and HapMap samples                                                                                       |
| 7      | chr3: 134.14 – 134.34          | -                                                                         | No            | -                                                                                                                                        |
| 8      | chr4: 119.04 – 119.83          | <i>NDST3, PRSS12</i>                                                      | Yes           | Deletions, CEPH and Yoruba samples, 36 diverse human samples                                                                             |
| 9      | chr6: 35.67 – 36.19            | <i>FKBP5, C6orf81, UNQ3045, CLPS, LHFPL5, SRPK1, SLC26A8, MAPK14</i>      | Yes           | Copy number differences, multiple global populations (CEPH, French, Chinese, Yoruba, HapMap-CEU)                                         |
| 10     | chr6: 109.54 – 110.26          | <i>C6orf182, CD164, ZBTB24, PPIL6, KIAA0274, SMPD2, MICAL1, C6orf199</i>  | Yes           | Deletions, HapMap samples                                                                                                                |
| 11     | chr7: 83.59 – 84.60            | <i>SEMA3D</i>                                                             | Yes           | Deletions, German and HapMap samples                                                                                                     |
| 12     | chr7: 86.10 – 86.52            | <i>GRM3, KIAA1324L, DMTF1, C7orf23</i>                                    | No            | -                                                                                                                                        |
| 13     | chr8: 58.03 – 58.42            | <i>IMPAD1</i>                                                             | Yes           | Copy number differences, multiple global populations (CEPH, French, Chinese, Japanese, Yoruba, HapMap samples, 36 diverse human samples) |
| 14     | chr8: 124.25 – 124.65          | <i>C8orf76, ZHX1, ATAD2, C8orf32, FBXO32</i>                              | No            | -                                                                                                                                        |
| 15     | chr10: 57.33 – 57.58           | -                                                                         | No            | -                                                                                                                                        |
| 16     | chr10: 86.52 – 87.06           | -                                                                         | No            | -                                                                                                                                        |
| 17     | chr11: 13.90 – 14.07           | <i>SPON1</i>                                                              | No            | -                                                                                                                                        |
| 18     | chr12: 109.53 – 110.39         | <i>PPP1CC, MYL2, CUTL2, LNK, ATXN2</i>                                    | Yes           | Deletions, CEPH and HapMap samples                                                                                                       |
| 19     | chr18: 28.80 – 29.27           | <i>C18orf34</i>                                                           | Yes           | Null genotypes, CEPH and HapMap samples                                                                                                  |
| 20     | chr21: 37.77 – 38.65           | <i>DYRK1A, KCNJ6, DSCR4, DSCR8, DSCR10, KCNJ15</i>                        | Yes           | Deletions, French                                                                                                                        |

<sup>1</sup> Copy number differences refer to the occurrence of both insertions and deletions.

<sup>2</sup> CEPH/Chinese/Japanese/Yoruba samples: Kidd et al. (2008); German: Pinto et al. (2007); HapMap samples: Conrad et al. (2006), McCarroll et al. (2006), Redon et al. (2006), Pinto et al. (2007); French: de Smith et al. (2007); Canadian Ontario controls: Zogopoulos et al. (2007); HapMap-CEU: Wang et al. (2008); 36 diverse human samples: Mills et al. (2006); CEU-Trios/Yoruba-Trios: Conrad et al. (2006).

**Supplementary Table 6.** Proportions of simulated datasets out of 1000 with standardized varLD scores greater than the corresponding quantile values.

| Scenario                                  | Positive rates              |                             |                             |
|-------------------------------------------|-----------------------------|-----------------------------|-----------------------------|
|                                           | > 90 <sup>th</sup> quantile | > 95 <sup>th</sup> quantile | > 99 <sup>th</sup> quantile |
| (i) Identical populations                 | 0.346                       | 0.167                       | 0.026                       |
| <b>Genotyping errors</b>                  |                             |                             |                             |
| (ii) 1 <sup>st</sup> SNP in pop 2         | 0.491                       | 0.257                       | 0.029                       |
| (iii) 20 <sup>th</sup> SNP in pop 2       | 0.439                       | 0.238                       | 0.029                       |
| (iv) 5 random SNPs in pop 2               | 0.744                       | 0.552                       | 0.088                       |
| (v) 5 consecutive SNPs in pop 2           | 0.992                       | 0.957                       | 0.555                       |
| <b>Differences in recombination rates</b> |                             |                             |                             |
| (vi) SNPs 46 – 50                         | 0.597                       | 0.395                       | 0.075                       |
| (vii) SNPs 31 – 50                        | 0.651                       | 0.414                       | 0.070                       |

## **ADDITIONAL SUPPLEMENTARY FILES**

**Supplementary File 1.** (identified\_region\_CEU\_JPT+CHB.xls)

Contains identified regions with LD dissimilarities between HapMap CEU and HapMap CHB+JPT populations.

**Supplementary File 2.** (identified\_region\_CEU\_YRI.xls)

Contains identified regions with LD dissimilarities between HapMap CEU and HapMap YRI populations.

**Supplementary File 3.** (identified\_region\_JPT+CHB\_YRI.xls)

Contains identified regions with LD dissimilarities between HapMap CHB+JPT and HapMap YRI populations.

**Supplementary File 4.** (identified\_region\_CEU\_58C.xls)

Contains identified regions with LD dissimilarities between HapMap CEU and WTCCC 58C populations.

**Supplementary File 5.** (identified\_region\_Jola\_YRI.xls)

Contains identified regions with LD dissimilarities between HapMap CEU and HapMap CHB+JPT populations.

**Supplementary File 6.** (varLD\_overlapping\_regions.xls)

Contains identified regions with LD dissimilarities between all five pairs of population comparisons.
